# Supplementary material for: Deep red luminescent hybrid copolymer materials with high transition metal cluster content
Source: Royal Society of Chemistry journal article supplement (doi:10.1039/c3tc31309c), 2013-12-06
Supplement: c3tc31309c.pdf [file c3tc31309c.pdf]

# Deep Red Luminescent Hybrid coPolymer Materials With High Transition Metal Clusters Content.

Maria Amela-Cortes,<sup>a</sup> Alexandre Garreau,<sup>b</sup> Stéphane Cordier,<sup>a</sup> Eric Faulques,<sup>b</sup> Jean-Luc Duvail,<sup>b</sup> and Yann Molard<sup>a,\*</sup>

## Electronic Supplementary Informations

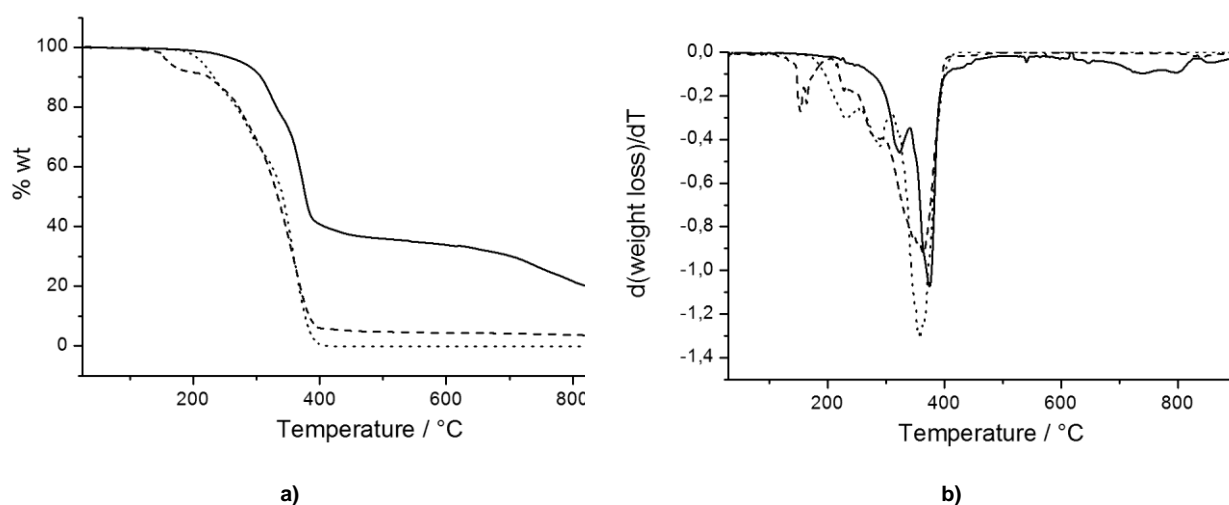

Figure 1s: Thermograms obtained by TGA measurements left: % weight of sample; right: differential of weight loss of PM50 (plain line), PM10 (dashed line), PM1 (dotted line)

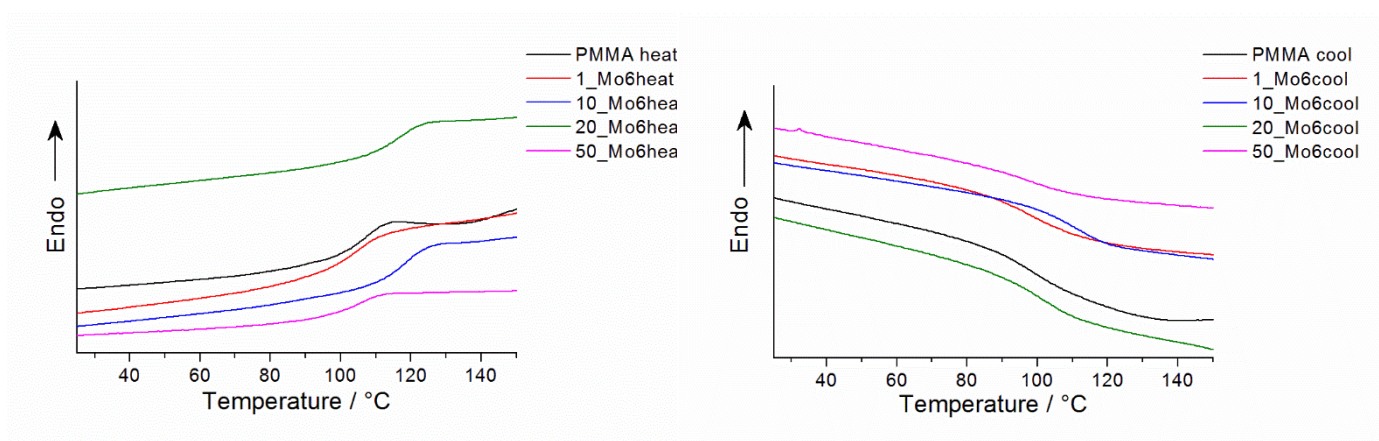

Figure 2s: DSC thermograms obtained for all samples, a) on heating, b) on cooling at 10 K.min<sup>-1</sup>

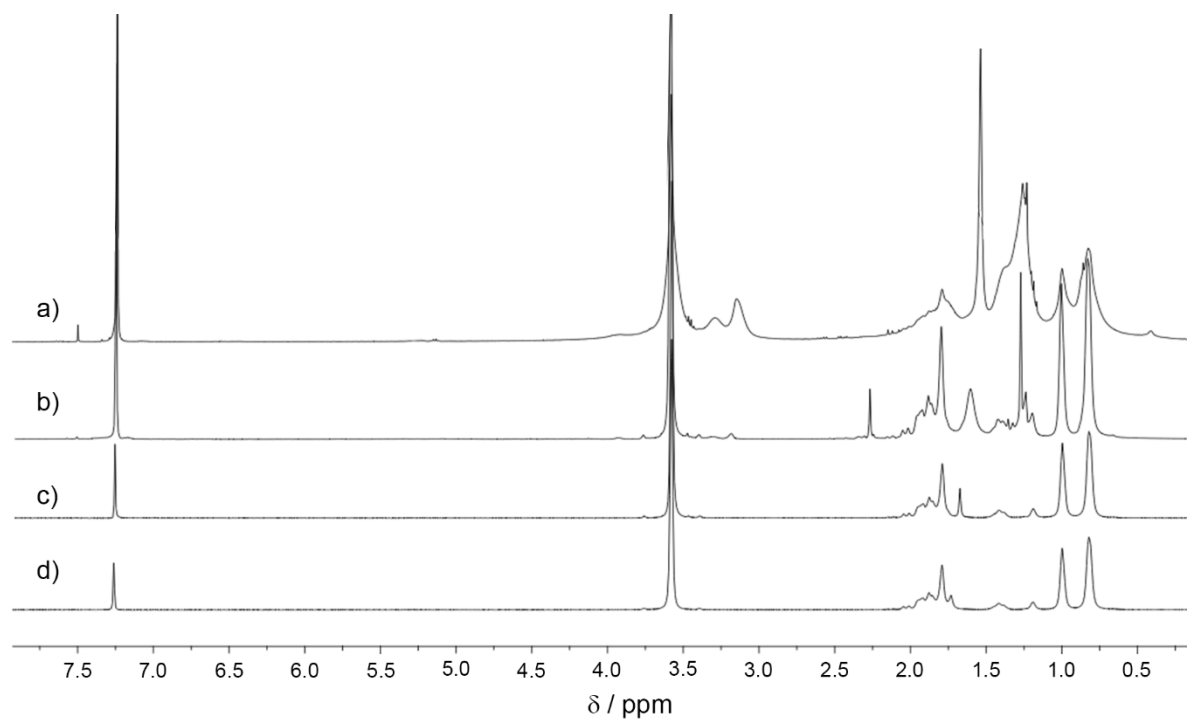

**Figure 3s:** <sup>1</sup>H 400 MHz NMR spectra of a) PM20 (soluble part), b) PM10, c) PM1, d) PM0 in CDCl<sub>3</sub>.

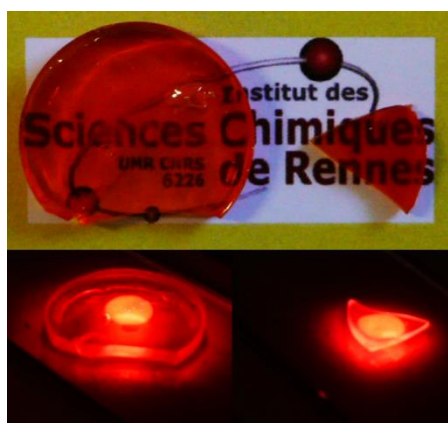

**Figure4s:** Picture of pieces of PM20 (left) and PM50 (right) under daylight (top) and UV irradiation at 350-380 nm (bottom). The thickness of both samples is 1.2mm and 0.8 mm for PM20 and PM50 respectively.

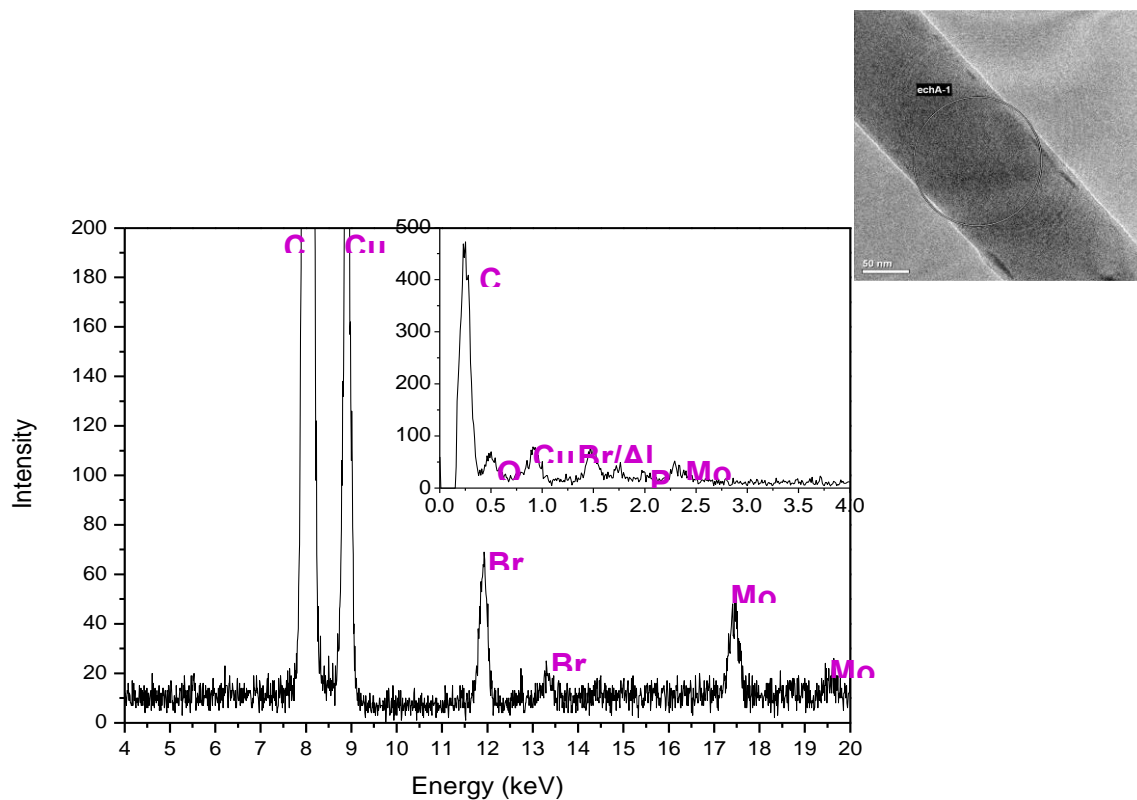

Figure 5s: EDAX analysis of PM10 sample.

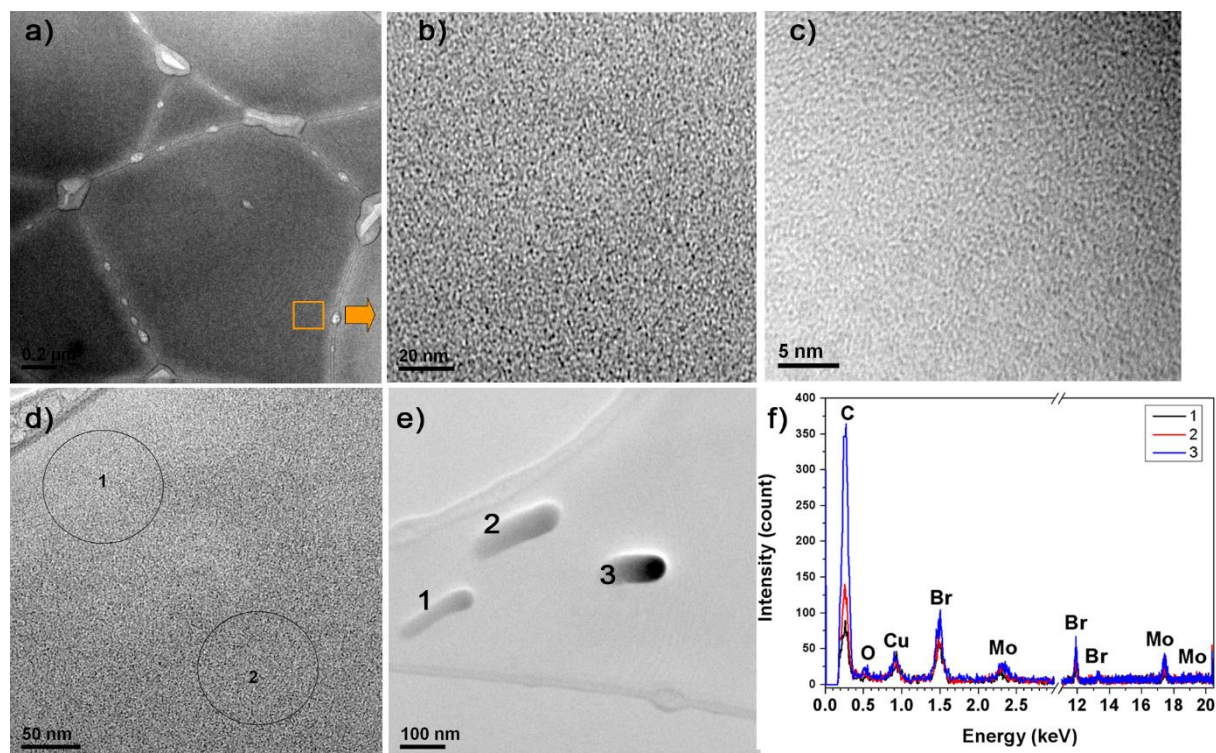

Figure 6s: TEM pictures of PM20 at different scales (a, b, c); TEM pictures of the same area before d) and after e) EDX analysis; f) graph of edx analysis of PM20

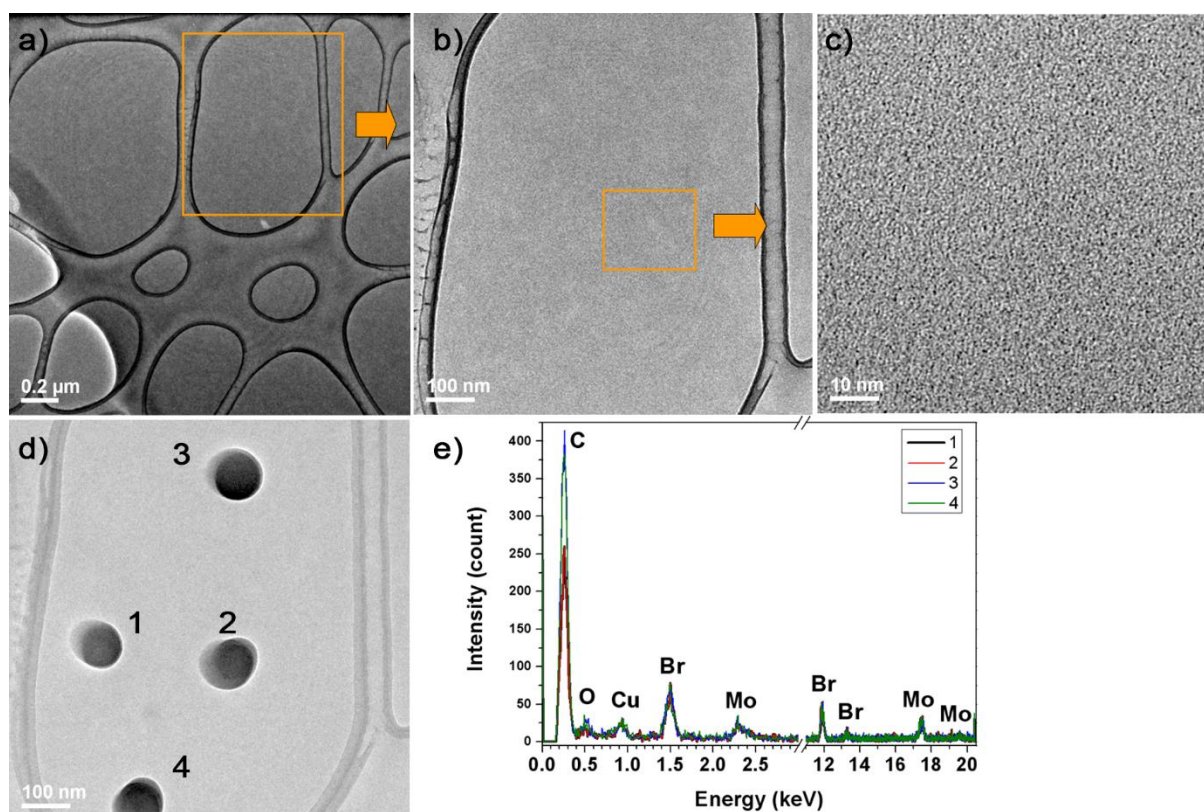

**Figure 7s:** TEM pictures of PM50 at different scales (a, b, c); TEM pictures of the same area before b) and after d) EDX analysis; e) graph of edx analysis of PM50

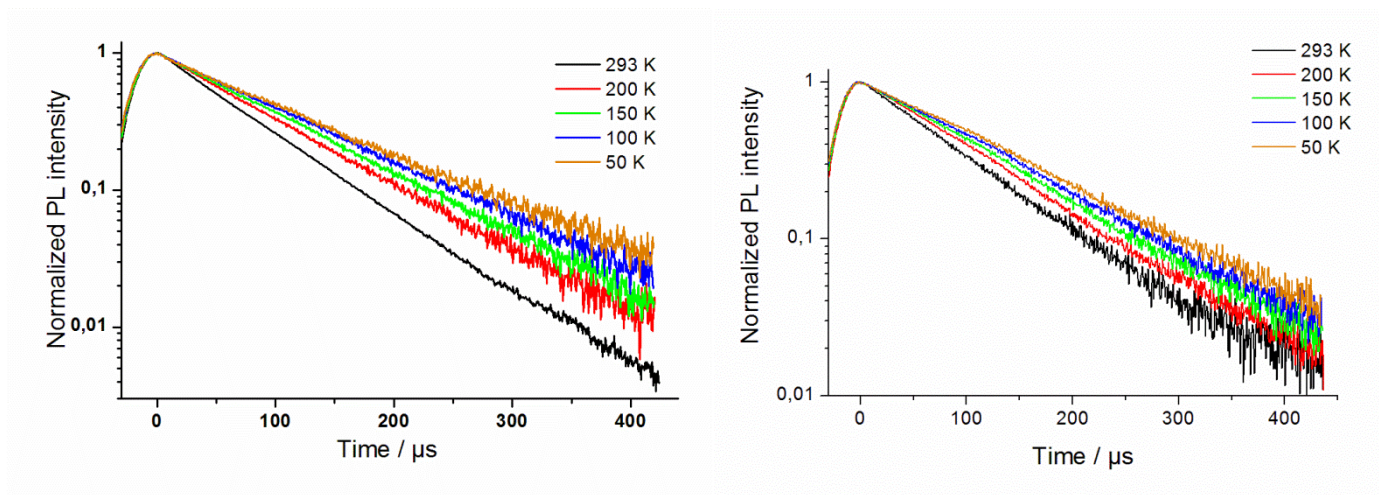

**Figure 8s:** Emission decay profiles as a function of temperature for (left)  $[(n-C_4H_9)_4N]_2[Mo_6Br_{14}]$  in its powdered form and (right) PM10.

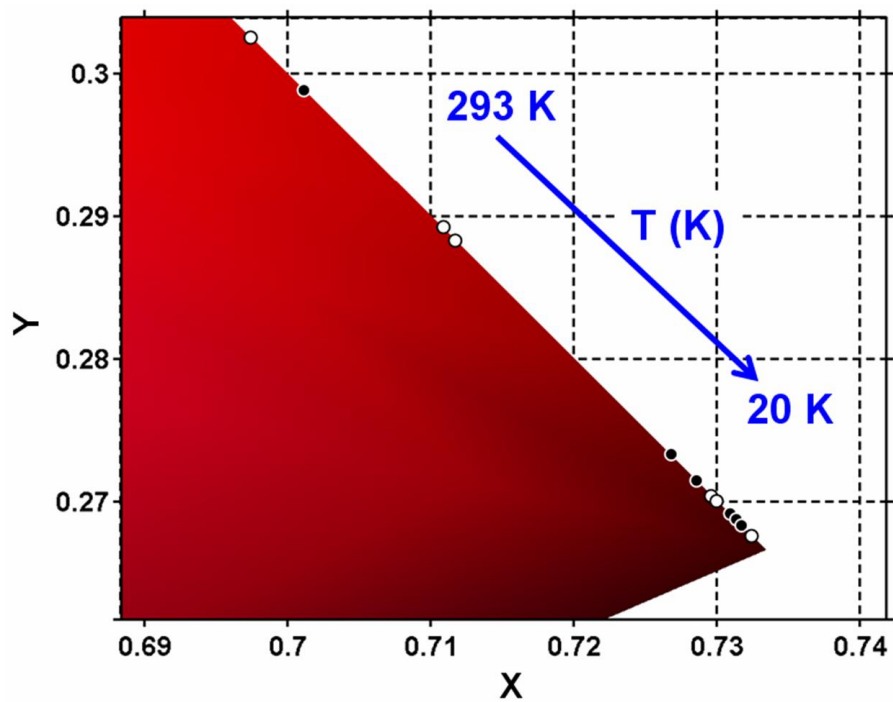

**Figure 9s:** Representation of  $[(n-C_4H_9)_4N]_2Mo_6Br_{14}$  (black circle) and PM10 (white circle) (x,y) coordinates in the CIE chromaticity diagram from 293 K to 20 K.
